# Supplementary material
Source: Springer Nature journal article supplement (https://www.springermedizin.de/resource/supplementary/12984_2008_155_MOESM3_ESM.pdf/9605420)

II protocol I protocol

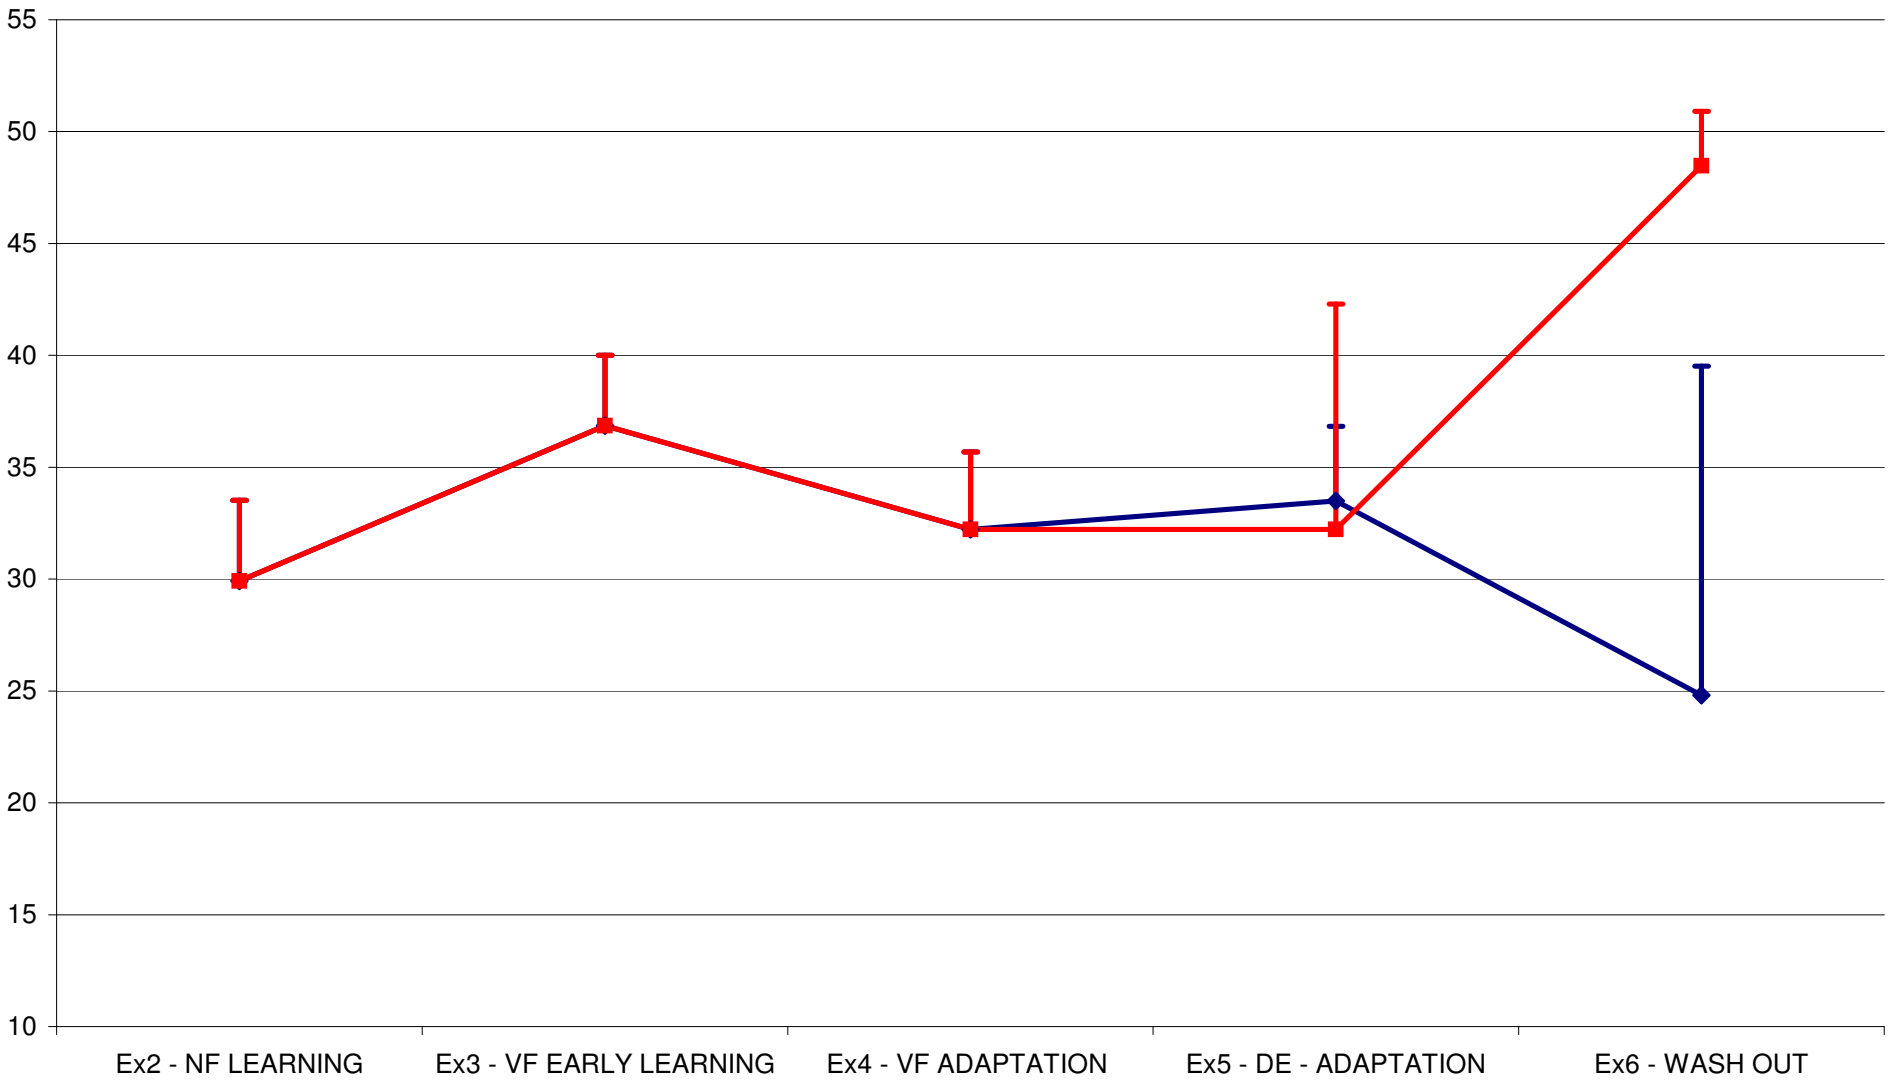

Supplement: MOESM3 [file 9605420]
